# Supplementary material for: Heritability of fear of humans in urban and rural populations of a bird species
Source: PubMed Central journal article supplement (PMC4976307; doi:10.1038/srep31060), 2016-08-08

## **Heritability of fear of humans in urban and rural populations of a bird species**

**Martina Carrete<sup>1,2, \*</sup>, Jesús Martínez-Padilla,<sup>2,3</sup> Sol Rodríguez-Martínez<sup>4</sup>, Natalia Rebolo-Ifrán<sup>5</sup>, Antonio Palma<sup>2</sup>, and José L. Tella<sup>2</sup>**

<sup>1</sup>Department of Physical, Chemical and Natural Systems, Universidad Pablo de Olavide, Sevilla, Spain

<sup>2</sup>Department of Conservation Biology, Estación Biológica de Doñana, CSIC, Sevilla, Spain.

<sup>3</sup>Research Unit of Biodiversity – UMIB (CSIC/ UO/PA), University of Oviedo, Spain.

<sup>4</sup>Department of Biology, Biochemistry and Pharmacy, Universidad Nacional del Sur, Bahía Blanca, Argentina

<sup>5</sup>Departamento de Ecología, Genética y Evolución & IEGEBA-CONICET, Facultad de Ciencias Exactas y Naturales, Universidad de Buenos Aires, Buenos Aires, Argentina

\*Corresponding author: [martina@ebd.csic.es](mailto:martina@ebd.csic.es)

## Appendix 1

We ran MCMCglms with different priors (ie, different V and nu values) to test the sensitivity of our heritability estimates to them. Each group of models (ie, models sharing the same prior) were built considering the potential effects of sex and habitat on (log)FID. Models were ranked based on DIC, smaller values suggesting a better model. As commonly performed with AIC (Akaike Information Criterion),  $\Delta\text{DIC} < 2$  suggests alternative models.

**Table S1.** MCMCglmm built to calculate heritability of fear of humans in the burrowing owl *Athene cunicularia*. Heritability ( $h^2$ ) and estimates of fixed effects ( $\beta$ ) are shown with their 95% credible intervals (95% CI) and effective sizes (ES). DIC: Deviance Information Criterion.  $\Delta\text{DIC}$ :  $\text{DIC}_{\text{model}} - \text{DIC}_{\text{best model}}$ .

| Model                | Prior         | DIC    | $\Delta\text{DIC}$ | $h^2$ | 95% CI      | ES   | Fixed effects  | $\beta$ | 95% CI        | ES   |
|----------------------|---------------|--------|--------------------|-------|-------------|------|----------------|---------|---------------|------|
| (log)fid~habitat+sex | V=1, nu=0.002 | 205.58 | 0.00               | 0.37  | 0.18 - 0.62 | 1974 | habitat(urban) | -0.42   | -0.45 - -0.39 | 4950 |
|                      |               |        |                    |       |             |      | sex(female)    | 0.06    | 0.03 - 0.08   | 4834 |
| (log)fid~habitat     |               | 221.83 | 16.26              | 0.39  | 0.17 - 0.61 | 2010 | habitat(urban) | -0.42   | -0.45 - -0.4  | 4950 |

|                                    |        |        |      |             |      |                |       |               |      |
|------------------------------------|--------|--------|------|-------------|------|----------------|-------|---------------|------|
| (log)fid~sex                       | 240.18 | 34.60  | 0.78 | 0.60 - 0.93 | 1650 | sex(female)    | 0.06  | 0.03 - 0.09   | 4735 |
| (log)fid~none                      | 231.86 | 26.29  | 0.77 | 0.61 - 0.94 | 1792 |                |       |               |      |
| (log)fid~habitat+sex V=1, nu=0.02  | 202.44 | 0.00   | 0.43 | 0.19 - 0.60 | 2502 | habitat(urban) | -0.42 | -0.45 - -0.39 | 4950 |
|                                    |        |        |      |             |      | sex(female)    | 0.06  | 0.03 - 0.08   | 4950 |
| (log)fid~habitat                   | 213.97 | 11.53  | 0.41 | 0.21 - 0.62 | 2565 | habitat(urban) | -0.42 | -0.45 - -0.39 | 4950 |
| (log)fid~sex                       | 229.06 | 26.62  | 0.74 | 0.61 - 0.92 | 2308 | sex(female)    | 0.06  | 0.02 - 0.09   | 4950 |
| (log)fid~none                      | 222.90 | 20.46  | 0.79 | 0.60 - 0.91 | 2375 |                |       |               |      |
| (log)fid~habitat+sex V=1, nu=1     | 164.89 | 0.00   | 0.47 | 0.37 - 0.59 | 4950 | habitat(urban) | -0.42 | -0.45 - -0.39 | 4950 |
|                                    |        |        |      |             |      | sex(female)    | 0.06  | 0.03 - 0.09   | 4950 |
| (log)fid~habitat                   | 178.86 | 13.97  | 0.49 | 0.37 - 0.59 | 4950 | habitat(urban) | -0.42 | -0.06         | 4950 |
| (log)fid~sex                       | 277.62 | 112.73 | 0.62 | 0.51 - 0.74 | 4703 | sex(female)    | 0.06  | 0.03 - 0.09   | 4950 |
| (log)fid~none                      | 287.23 | 122.34 | 0.6  | 0.50 - 0.73 | 4547 |                |       |               |      |
| (log)fid~habitat+sex V=1, nu=1.002 | 164.98 | 0.00   | 0.46 | 0.37 - 0.59 | 4950 | habitat(urban) | -0.42 | -0.45 - -0.39 | 4600 |
|                                    |        |        |      |             |      | sex(female)    | 0.06  | 0.03 - 0.08   | 4950 |
| (log)fid~habitat                   | 178.97 | 13.99  | 0.48 | 0.36 - 0.59 | 4786 | habitat(urban) | -0.42 | -0.45 - -0.39 | 4950 |
| (log)fid~sex                       | 276.41 | 111.43 | 0.64 | 0.49 - 0.73 | 4555 | sex(female)    | 0.06  | 0.03 - 0.09   | 5189 |

|                      |                    |         |        |      |             |      |                |       |               |      |
|----------------------|--------------------|---------|--------|------|-------------|------|----------------|-------|---------------|------|
| (log)fid~none        |                    | 285.06  | 120.08 | 0.62 | 0.51 - 0.74 | 4513 |                |       |               |      |
| (log)fid~habitat+sex | V=1, nu=1000       | 3817.42 | 0.40   | 0.5  | 0.48 - 0.52 | 4950 | habitat(urban) | -0.42 | -0.52 - -0.31 | 4477 |
|                      |                    |         |        |      |             |      | sex(female)    | 0.06  | -0.04 - 0.16  | 5165 |
| (log)fid~habitat     |                    | 3817.02 | 0.00   | 0.5  | 0.48 - 0.52 |      | habitat(urban) | -0.42 | -0.52 - -0.32 | 4677 |
| (log)fid~sex         |                    | 3873.61 | 56.60  | 0.5  | 0.48 - 0.52 | 4950 | sex(female)    | 0.06  | -0.04 - 0.16  | 4950 |
| (log)fid~none        |                    | 3873.23 | 56.21  | 0.5  | 0.48 - 0.52 | 4437 |                |       |               |      |
|                      | V=matrix(p.var/2), |         |        |      |             |      |                |       |               |      |
| (log)fid~habitat+sex | n=1                | 195.16  | 0.00   | 0.42 | 0.23 - 0.60 | 2760 | habitat(urban) | -0.42 | -0.45 - -0.39 | 5269 |
|                      |                    |         |        |      |             |      | sex(female)    | 0.06  | 0.03 - 0.08   | 4689 |
| (log)fid~habitat     |                    | 210.10  | 14.94  | 0.41 | 0.22 - 0.61 | 2927 | habitat(urban) | -0.42 | -0.45 - -0.39 | 4950 |
| (log)fid~sex         |                    | 229.56  | 34.40  | 0.78 | 0.60 - 0.90 |      | sex(female)    | 0.06  | 0.03 - 0.09   | 4950 |
| (log)fid~none        |                    | 214.52  | 19.35  | 0.78 | 0.58- 0.89  |      |                |       |               |      |

Figure S1. Heritabilities ( $h^2$ ) of fear of humans in burrowing owls and their credible intervals obtained using different priors.

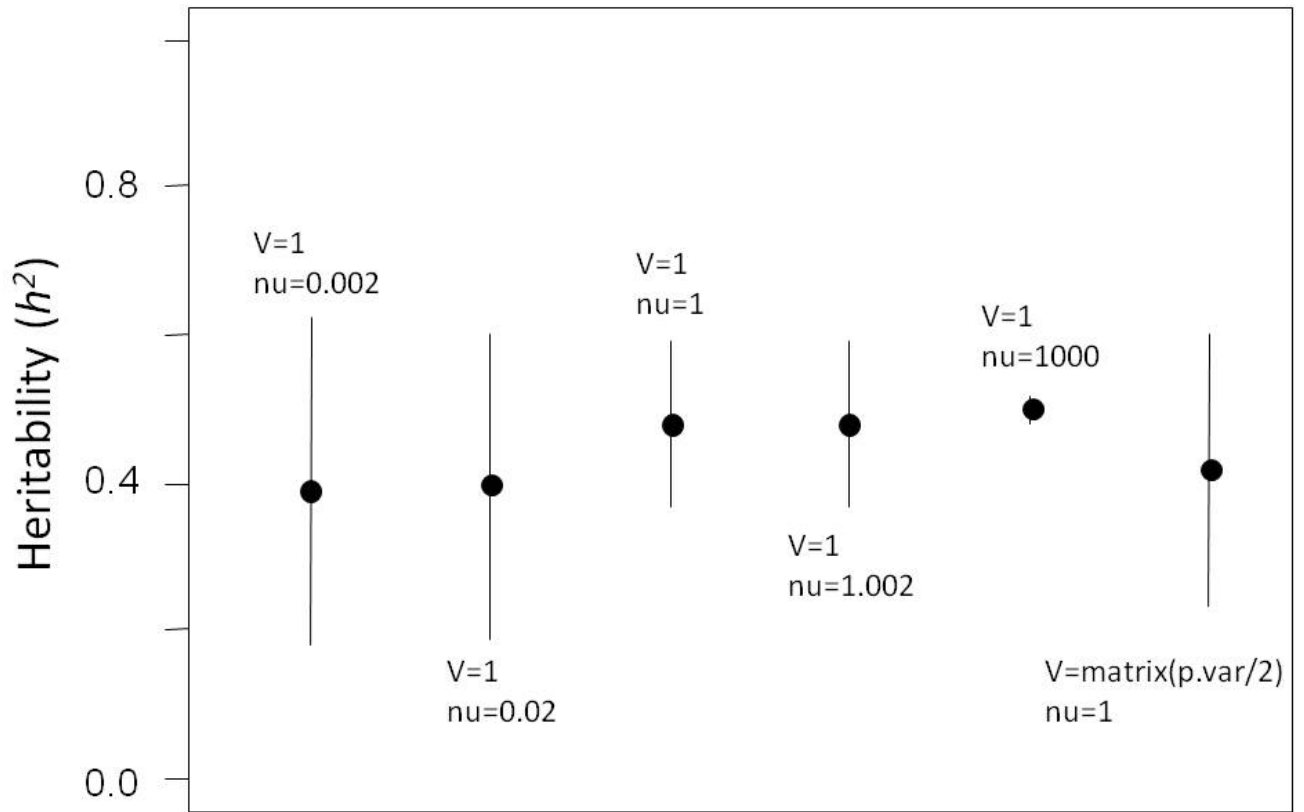

Considering that priors have no significant effects on heritability estimates, we calculate the additive genetic and the phenotypic variance ( $V_A$  and  $V_P$ , respectively) of fear of humans. Models were run for all birds together and for urban and rural birds separately (Table S2).

Table S2. Models ran to estimate the additive genetic and the phenotypic variance ( $V_A$  and  $V_P$ , respectively) of fear of humans for all birds together and separately for urban and rural birds, using an uninformative prior for the fixed and random variances ( $V=1$ ,  $\nu=0.02$ ).

| Model       | $V_A$ | 95%CI       | $V_P$ | 95%CI       |
|-------------|-------|-------------|-------|-------------|
| All bird    | 0.03  | 0.02 – 0.05 | 0.08  | 0.07 – 0.08 |
| Urban birds | 0.04  | 0.01 - 0.05 | 0.07  | 0.07 - 0.08 |
| Rural birds | 0.05  | 0.02 - 0.08 | 0.08  | 0.07 - 0.09 |

Figure S2. FID measured on offspring and parent (father and mother) burrowing owls.

White and black dots represent urban and rural birds, respectively.

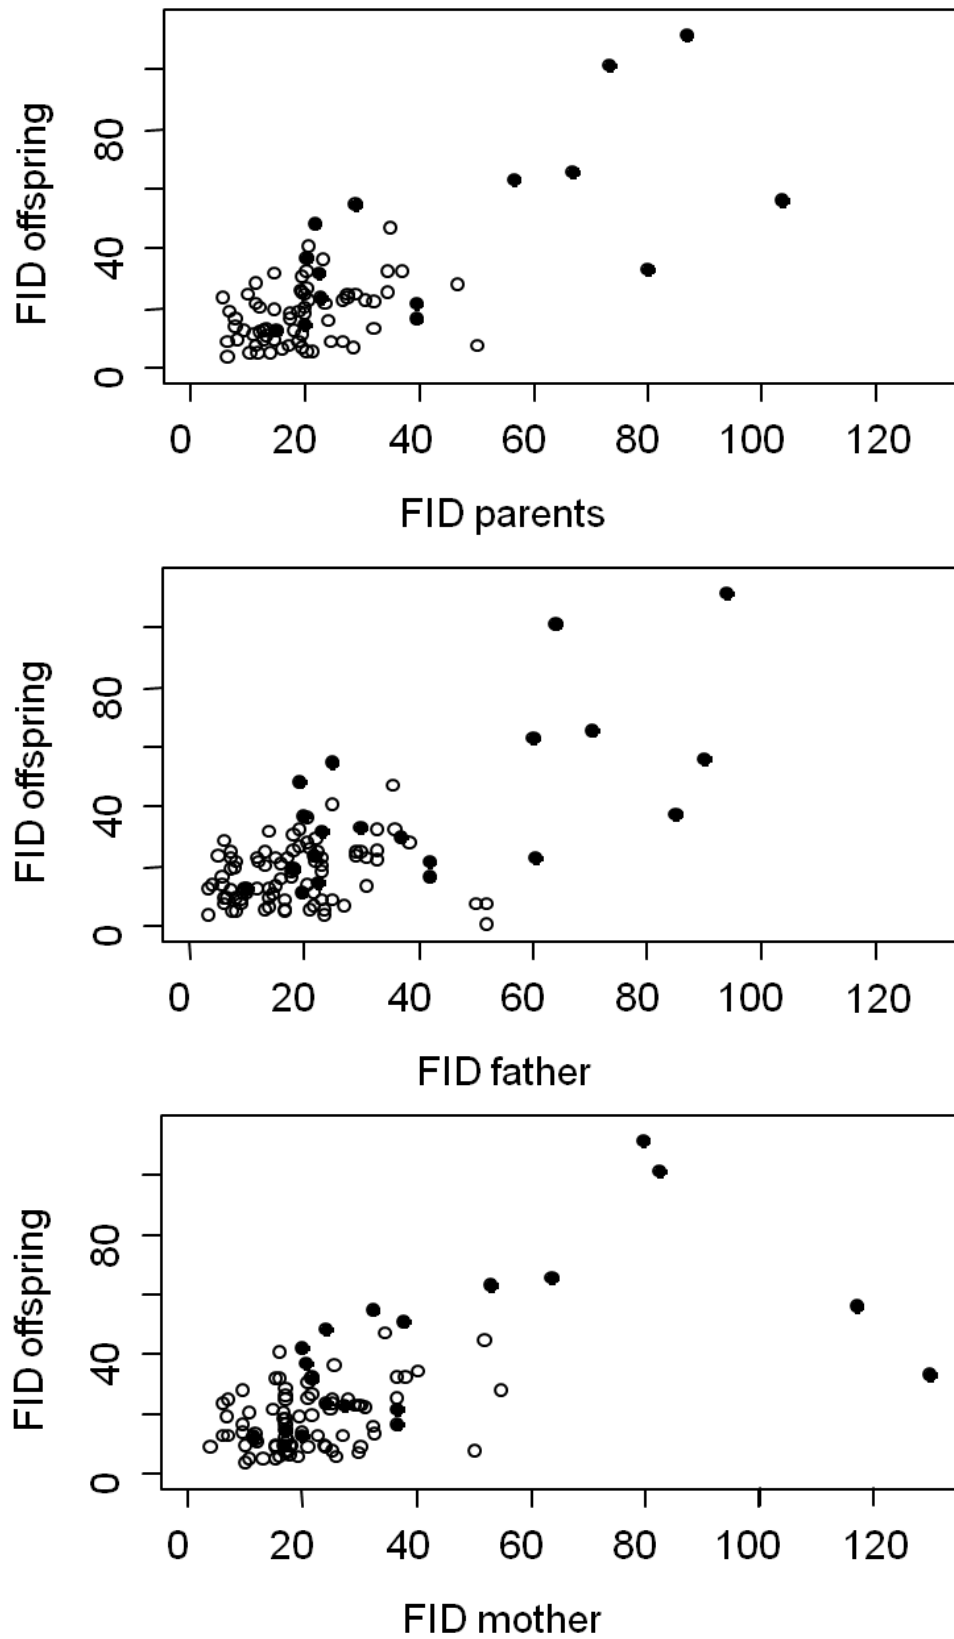

Supplement: srep31060-s1.pdf [file srep31060-s1.pdf]
